# Supplementary material for: Biological Evaluation of 3-Azaspiro[Bicyclo[3.1.0]Hexane-2,5′-Pyrimidines] as Potential Antitumor Agents
Source: MDPI journal article supplement (doi:10.3390/ijms231810759), 2022-09-15
Supplement: s1 [file s1]

# *Supporting information*

## **Table of contents**

|    |                                                                                                                       |           |
|----|-----------------------------------------------------------------------------------------------------------------------|-----------|
| 1. | Cytotoxicity of 3-azaspiro[bicyclo[3.1.0]hexane-2,5'-pyrimidines] <b>4a-v</b> against K562, HeLa and CT26 cell lines. | <b>S2</b> |
| 2. | In Silico Study                                                                                                       | <b>S5</b> |

**1. Cytotoxicity of 3-azaspiro[bicyclo[3.1.0]hexane-2,5'-pyrimidines] 4a-v against K562, HeLa and CT26 cell lines**

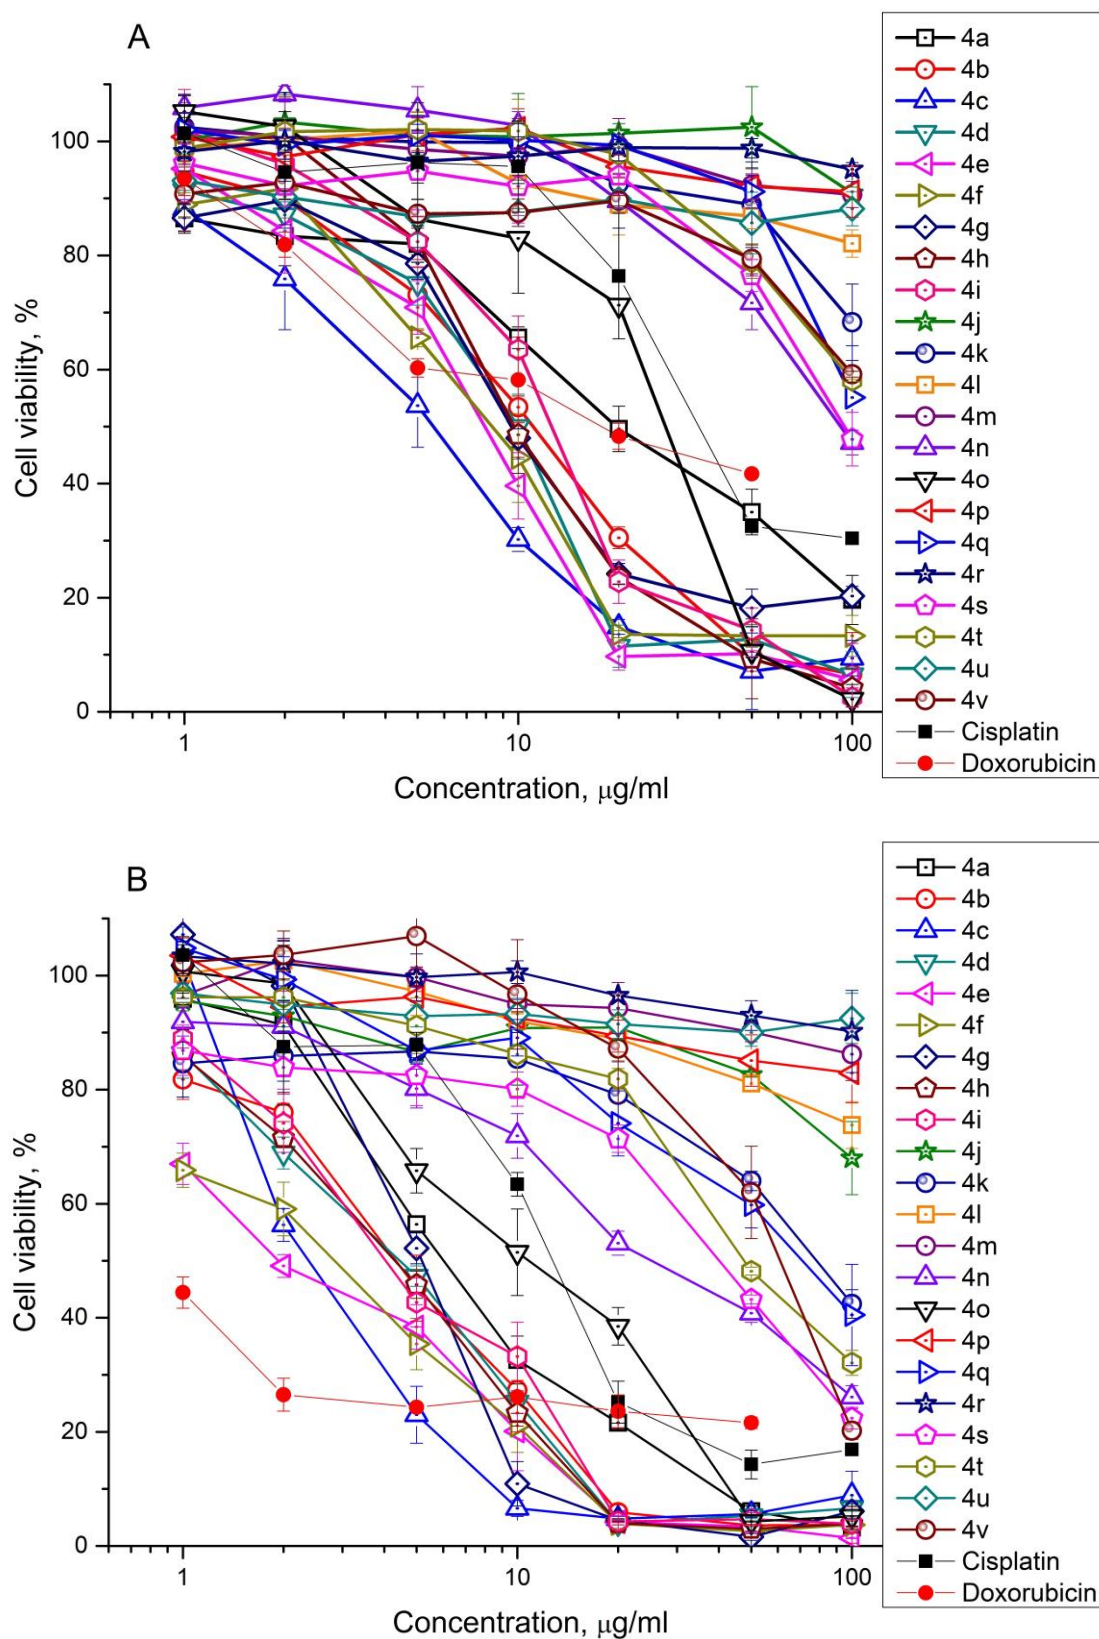

**Figure S1.** Cytotoxicity of 3-azaspiro[bicyclo[3.1.0]hexane-2,5'-pyrimidines] 4a-v against K562 cell line for 24 h (A) and 72 h (B).

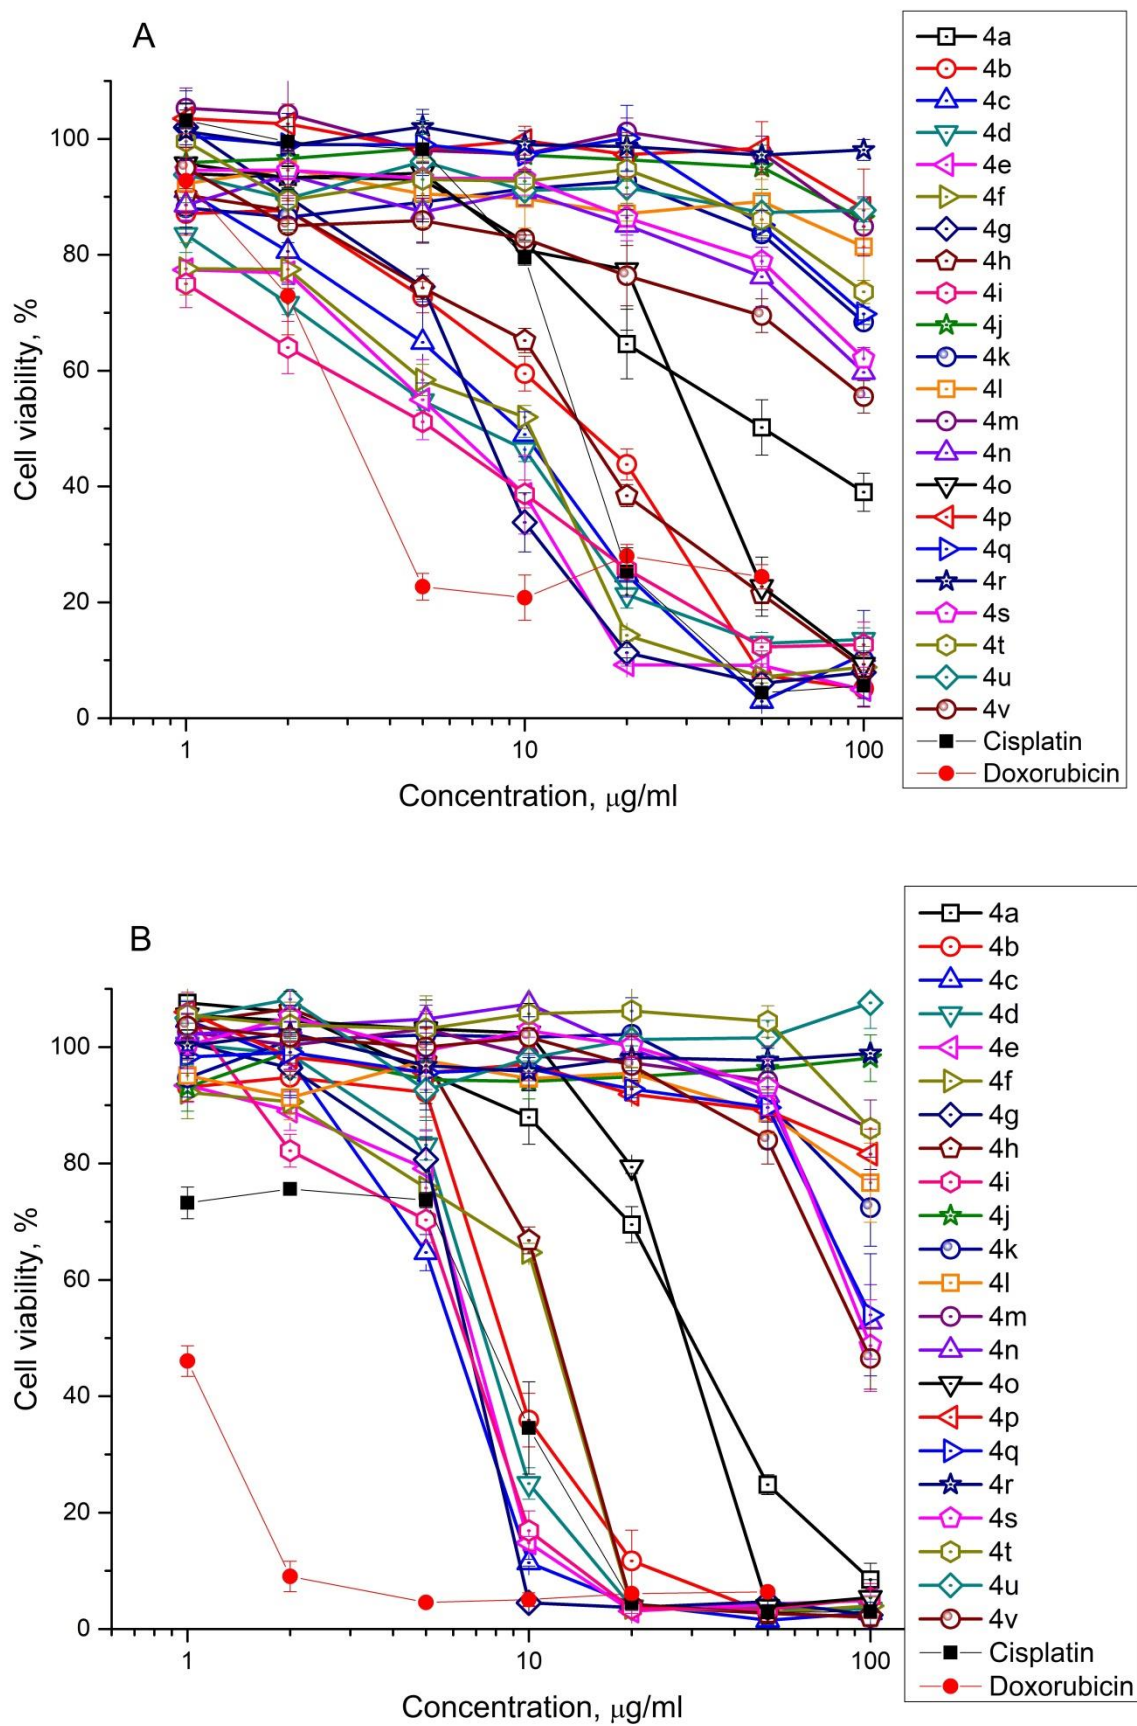

**Figure S2.** Cytotoxicity of 3-azaspiro[bicyclo[3.1.0]hexane-2,5'-pyrimidines] **4a-v** against HeLa cell line for 24 h (A) and 72 h (B).

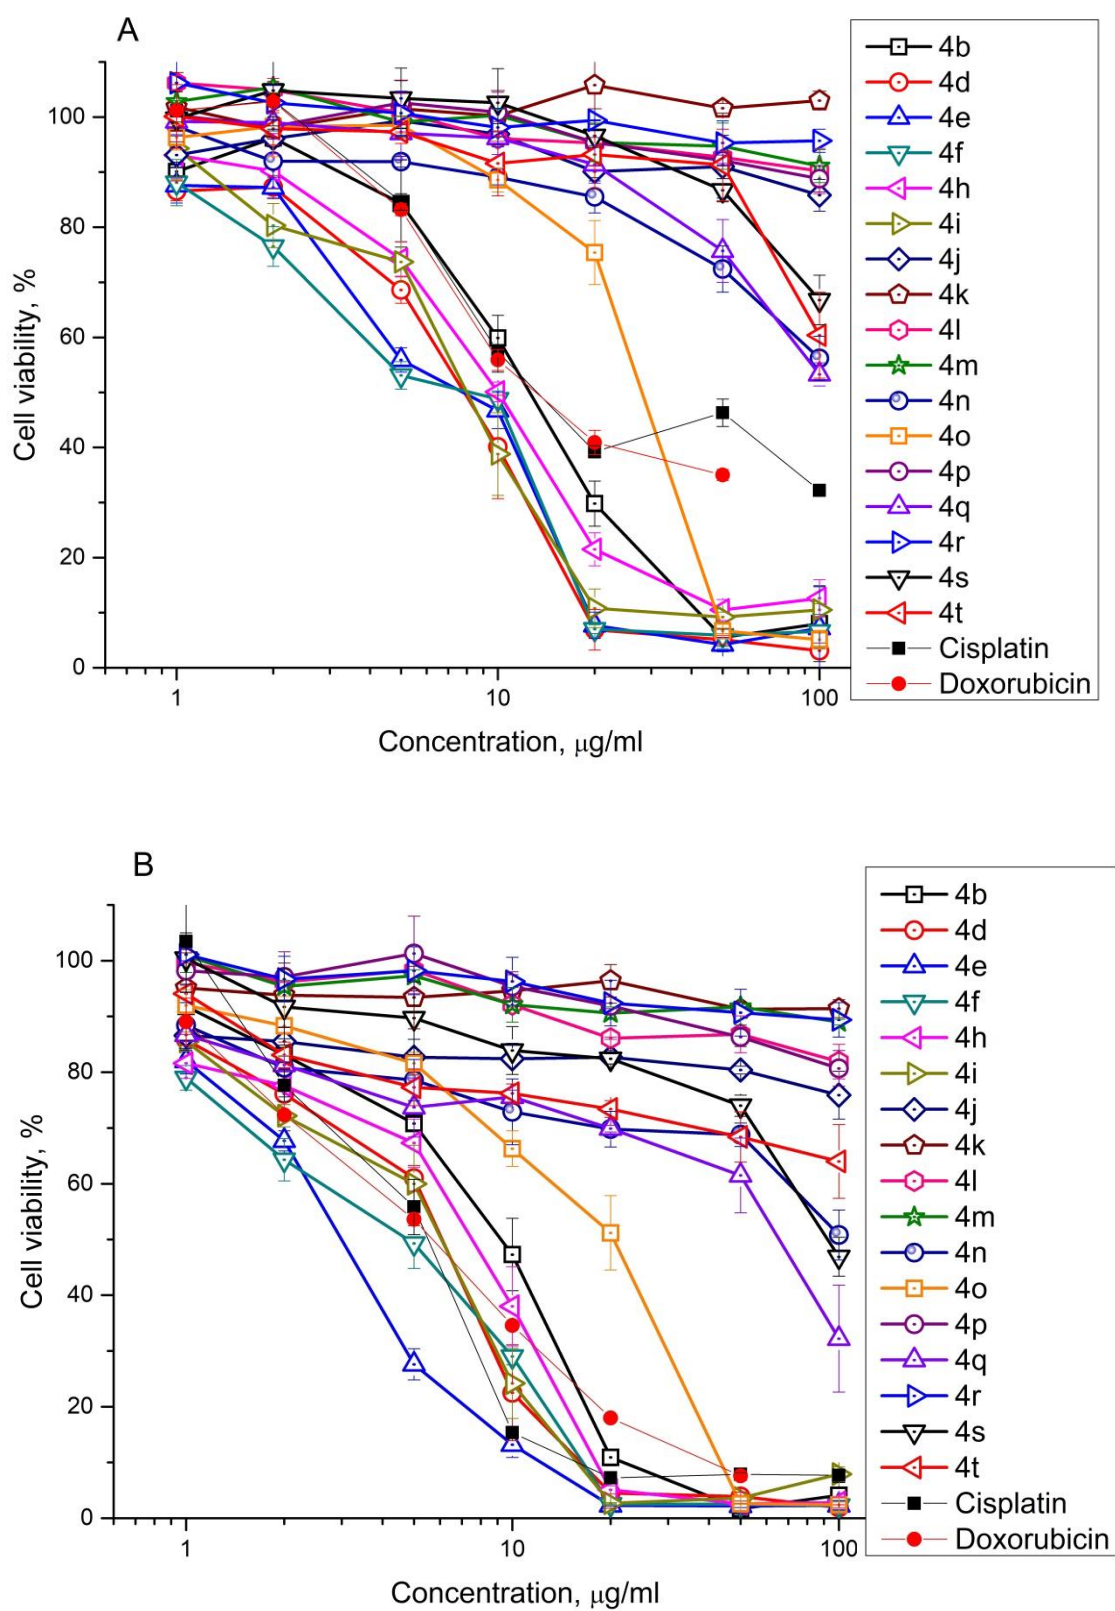

**Figure S3.** Cytotoxicity of 3-azaspiro[bicyclo[3.1.0]hexane-2,5'-pyrimidines] **4a-t** against CT6 cell line for 24 h (A) and 72 h (B).



## 2. In Silico Study

To predict the drug-likeness of selected compounds, the Lipinski rule of five was used. This rule describes molecular properties important for a drug's pharmacokinetics in a human body, including their absorption, distribution, metabolism and excretion (ADME). The Lipinski rule of five deals with simple physicochemical parameter ranges: Molecular weight (Mol. wt)  $\leq 500$ , Octanol/water partition coefficient (C Log P)  $\leq 5$ , H-bond donors  $\leq 5$  and H-bond acceptors  $\leq 10$ . These parameters were calculated using Molinspiration online tool (<https://www.molinspiration.com/cgi-bin/properties>). Other ADME parameters such as Colon adenocarcinoma Caco2 permeability, Human intestinal absorption (HIA), Plasma protein binding ability (PPB) and ability to penetrate Blood–Brain-Barrier (BBB) were calculated using PREADMET online tool (<https://preadmet.bmdrc.kr>).

**Table S1.** Physicochemical properties of the synthesized compounds.

| Compound                                                                                  | Mol. wt <sup>1</sup> | H-bond donors <sup>2</sup> | H-bond acceptors <sup>3</sup> | C Log P <sup>4</sup> | TPSA (Å <sup>2</sup> ) <sup>5</sup> |
|-------------------------------------------------------------------------------------------|----------------------|----------------------------|-------------------------------|----------------------|-------------------------------------|
| Rule                                                                                      | $\leq 500$           | $\leq 5$                   | $\leq 10$                     | $\leq 5$             | $\leq 140$                          |
| 4d<br>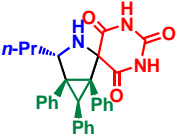  | 465.55               | 3                          | 6                             | 4.17                 | 87.29                               |
| 4e<br> | 479.58               | 3                          | 6                             | 4.67                 | 87.29                               |
| 4f<br> | 479.58               | 3                          | 6                             | 4.38                 | 87.29                               |
| 4h<br> | 497.62               | 3                          | 6                             | 3.52                 | 87.29                               |
| 4i<br> | 499.57               | 3                          | 6                             | 4.32                 | 87.29                               |
| 4t<br> | 502.62               | 4                          | 8                             | 3.51                 | 116.39                              |
| Cisplatin                                                                                 | 300,05               | 6                          | 2                             | -4,58                | 55.28                               |

<sup>1</sup> Molecular weight, <sup>2</sup> Number of hydrogen bond donors, <sup>3</sup> Number of hydrogen bond acceptors,

<sup>4</sup> Logarithmic ratio of the octanol–water partitioning coefficient (C Log P), <sup>5</sup> Topological polar surface area (TPSA).

**Table S2.** Prediction of pharmacokinetic properties of the synthesized compounds.

| Compound                                                                                          | Caco2 <sup>1</sup><br>permeability | HIA <sup>2</sup> (%) | PPB <sup>3</sup> (%) | BBB <sup>4</sup><br>(C <sub>brain</sub> /C <sub>blood</sub> ) |
|---------------------------------------------------------------------------------------------------|------------------------------------|----------------------|----------------------|---------------------------------------------------------------|
| Rule                                                                                              | ≥4                                 | ≥70                  | ≥90                  | ≥0.4                                                          |
| <div>4d</div> 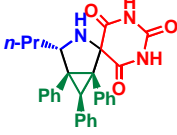   | 20.9716                            | 94.275941            | 99.621375            | 1.70696                                                       |
| <div>4e</div>    | 21.0369                            | 94.465005            | 99.489784            | 1.72804                                                       |
| <div>4f</div>    | 21.1223                            | 94.465238            | 99.000962            | 2.03649                                                       |
| <div>4h</div>    | 21.094                             | 94.787547            | 99.967144            | 0.223648                                                      |
| <div>4i</div>   | 21.102                             | 95.300067            | 100.000000           | 1.42975                                                       |
| <div>4t</div>  | 21.1189                            | 89.977411            | 85.329341            | 0.357404                                                      |

<sup>1</sup> Colon adenocarcinoma permeability, <sup>2</sup> Human intestinal absorption, <sup>3</sup> Plasma protein binding,

<sup>4</sup> Blood–brain barrier penetration.
